# Supplementary material for: Simultaneous determination of chlorinated aromatic hydrocarbons in fly ashes discharged from industrial thermal processes
Source: Royal Society of Chemistry journal article supplement (doi:10.1039/c7ay01545c), 2017-01-01
Supplement: c7ay01545c1.pdf [file c7ay01545c1.pdf]

*Supporting Information for*

**Simultaneous determination of chlorinated aromatic hydrocarbons in fly ashes discharged from the industrial thermal processes**

Yun Fan<sup>a</sup>, Haijun Zhang<sup>a,\*</sup>, Dan Wang<sup>a,b</sup>, Meihui Ren<sup>a,b</sup>, Xueping Zhang<sup>a</sup>,

Longxing Wang<sup>a</sup>, Jiping Chen<sup>a,\*</sup>

<sup>a</sup> *Key Laboratory of Separation Science for Analytical Chemistry, Dalian Institute of Chemical Physics, Chinese Academy of Sciences, Dalian, 116023, China*

<sup>b</sup> *University of Chinese Academy of Sciences, Beijing 100049, China*

---

---

**\*Corresponding Authors**

Phone: +86-411-8437-9972, fax: +86-411-8437-9562; e-mail: [hjzhang@dicp.ac.cn](mailto:hjzhang@dicp.ac.cn).

Phone/fax: +86-411-8437-9562; e-mail: [chenjp@dicp.ac.cn](mailto:chenjp@dicp.ac.cn).

**Table S1** List of CAH standards used in this experiment

|           | Native Standards                                                                                   | Internal Standards                                                                                              | Recovery Standards                     |
|-----------|----------------------------------------------------------------------------------------------------|-----------------------------------------------------------------------------------------------------------------|----------------------------------------|
| Tetra- to | 2,3,7,8-TCDF                                                                                       | $^{13}\text{C}_{12}$ -2,3,7,8-TCDF                                                                              | $^{13}\text{C}_{12}$ -1,2,3,4-TCDD     |
| octa-     | 1,2,3,7,8-PeCDF                                                                                    | $^{13}\text{C}_{12}$ -1,2,3,7,8-PeCDF                                                                           | $^{13}\text{C}_{12}$ -1,2,3,7,8,9-     |
| CDD/Fs    | 2,3,4,7,8-PeCDF                                                                                    | $^{13}\text{C}_{12}$ -2,3,4,7,8-PeCDF                                                                           | HxCDD                                  |
|           | 1,2,3,4,7,8-HxCDF                                                                                  | $^{13}\text{C}_{12}$ -1,2,3,4,7,8-HxCDF                                                                         |                                        |
|           | 1,2,3,6,7,8-HxCDF                                                                                  | $^{13}\text{C}_{12}$ -1,2,3,6,7,8-HxCDF                                                                         |                                        |
|           | 1,2,3,7,8,9-HxCDF                                                                                  | $^{13}\text{C}_{12}$ -1,2,3,7,8,9-HxCDF                                                                         |                                        |
|           | 2,3,4,6,7,8-HxCDF                                                                                  | $^{13}\text{C}_{12}$ -2,3,4,6,7,8-HxCDF                                                                         |                                        |
|           | 1,2,3,4,6,7,8-HpCDF                                                                                | $^{13}\text{C}_{12}$ -1,2,3,4,6,7,8-HpCDF                                                                       |                                        |
|           | 1,2,3,4,7,8,9-HpCDF                                                                                | $^{13}\text{C}_{12}$ -1,2,3,4,7,8,9-HpCDF                                                                       |                                        |
|           | OCDF                                                                                               | $^{13}\text{C}_{12}$ -2,3,7,8-TCDD                                                                              |                                        |
|           | 2,3,7,8-TCDD                                                                                       | $^{13}\text{C}_{12}$ -1,2,3,7,8-PeCDD                                                                           |                                        |
|           | 1,2,3,7,8-PeCDD                                                                                    | $^{13}\text{C}_{12}$ -1,2,3,4,7,8-HxCDD                                                                         |                                        |
|           | 1,2,3,4,7,8-HxCDD                                                                                  | $^{13}\text{C}_{12}$ -1,2,3,6,7,8-HxCDD                                                                         |                                        |
|           | 1,2,3,6,7,8-HxCDD                                                                                  | $^{13}\text{C}_{12}$ -1,2,3,4,6,7,8-HpCDD                                                                       |                                        |
|           | 1,2,3,7,8,9-HxCDD                                                                                  | $^{13}\text{C}_{12}$ -OCDD                                                                                      |                                        |
|           | 1,2,3,4,6,7,8-HpCDD                                                                                |                                                                                                                 |                                        |
|           | OCDD                                                                                               |                                                                                                                 |                                        |
| Tri- to   | IUPAC numbers 28, 52, 101, 138, 153, 180, 77, 81, 105, 114, 118, 123, 126, 156, 157, 167, 169, 189 | $^{13}\text{C}_{12}$ - PCB 28, 52, 101, 138, 153, 180, 77, 81, 105, 114, 118, 123, 126, 156, 157, 167, 169, 189 | $^{13}\text{C}_{12}$ -PCB 70, 111, 170 |
| hepta-CBs |                                                                                                    |                                                                                                                 |                                        |
| Mono- to  | IUPAC numbers 2, 6, 13, 28, 52, 66, 73, 75, 27, 36, 46, 48, 50, 53, 69, 72                         | $^{13}\text{C}_{12}$ - PCN 27, 42, 52, 67, 73, 75                                                               | $^{13}\text{C}_{12}$ - PCB 70, 111     |
| octa-CNs  |                                                                                                    |                                                                                                                 |                                        |
| Mono- and | 9-chfluorene                                                                                       | Phenanthrene-d <sub>10</sub>                                                                                    | Pyrene-d <sub>10</sub>                 |
| di-       | 9-chlorophenanthrene                                                                               |                                                                                                                 |                                        |
| CIPAHs    | 2-chloroanthracene                                                                                 |                                                                                                                 |                                        |
|           | 9-chloroanthracene                                                                                 |                                                                                                                 |                                        |
|           | 9,10-                                                                                              |                                                                                                                 |                                        |
|           | dichloroanthracene                                                                                 |                                                                                                                 |                                        |
|           | 3-chlorofluoranthene                                                                               |                                                                                                                 |                                        |
|           | 1,3-                                                                                               |                                                                                                                 |                                        |
|           | dichlorofluoranthene                                                                               |                                                                                                                 |                                        |
|           | 1-chloropyrene                                                                                     |                                                                                                                 |                                        |
|           | 6-chlorobenzo[a]                                                                                   |                                                                                                                 |                                        |
|           | pyrene                                                                                             |                                                                                                                 |                                        |

**Table S2** Masses and m/z types of monitored PCDD/Fs

| Mass/Charge ratio | m/z type | PCDD/F | Mass/Charge ratio | m/z type | PCDD/F                |
|-------------------|----------|--------|-------------------|----------|-----------------------|
| 319.8965          | M        | TCDD   | 331.9368          | M        | <sup>13</sup> C TCDD  |
| 321.8936          | M+2      | TCDD   | 333.9339          | M+2      | <sup>13</sup> C TCDD  |
| 355.8546          | M+2      | PeCDD  | 367.8949          | M+2      | <sup>13</sup> C PeCDD |
| 357.8516          | M+4      | PeCDD  | 369.8919          | M+4      | <sup>13</sup> C PeCDD |
| 389.8157          | M+2      | HxCDD  | 401.8559          | M+2      | <sup>13</sup> C HxCDD |
| 391.8128          | M+4      | HxCDD  | 403.8529          | M+4      | <sup>13</sup> C HxCDD |
| 423.7766          | M+2      | HpCDD  | 435.8169          | M+2      | <sup>13</sup> C HpCDD |
| 425.7737          | M+4      | HpCDD  | 437.8140          | M+4      | <sup>13</sup> C HpCDD |
| 457.7377          | M+2      | OCDD   | 469.7779          | M+2      | <sup>13</sup> C OCDD  |
| 459.7348          | M+4      | OCDD   | 471.7750          | M+4      | <sup>13</sup> C OCDD  |
| 303.9016          | M        | TCDF   | 315.9419          | M        | <sup>13</sup> C TCDF  |
| 305.8987          | M+2      | TCDF   | 317.9389          | M+2      | <sup>13</sup> C TCDF  |
| 339.8597          | M+2      | PeCDF  | 351.9000          | M+2      | <sup>13</sup> C PeCDF |
| 341.8567          | M+4      | PeCDF  | 353.8970          | M+4      | <sup>13</sup> C PeCDF |
| 373.8208          | M+2      | HxCDF  | 385.8610          | M+2      | <sup>13</sup> C HxCDF |
| 375.8179          | M+4      | HxCDF  | 387.8580          | M+4      | <sup>13</sup> C HxCDF |
| 407.7848          | M+2      | HpCDF  | 419.8220          | M+2      | <sup>13</sup> C HpCDF |
| 409.7789          | M+4      | HpCDF  | 421.8190          | M+4      | <sup>13</sup> C HpCDF |
| 441.7428          | M+2      | OCDF   |                   |          |                       |
| 443.7399          | M+4      | OCDF   |                   |          |                       |

**Table S3** Masses and m/z types of monitored PCBs

| Mass/Charge ratio | m/z type | PCB       | Mass/Charge ratio | m/z type | PCB                      |
|-------------------|----------|-----------|-------------------|----------|--------------------------|
| 255.9613          | M        | Cl-3 PCB  | 268.0016          | M        | <sup>13</sup> C Cl-3 PCB |
| 257.9584          | M+2      | Cl-3 PCB  | 269.9986          | M+2      | <sup>13</sup> C Cl-3 PCB |
| 289.9224          | M        | Cl-4 PCB  | 301.9626          | M        | <sup>13</sup> C Cl-4 PCB |
| 291.9194          | M+2      | Cl-4 PCB  | 303.9597          | M+2      | <sup>13</sup> C Cl-4 PCB |
| 325.8804          | M+2      | Cl-5 PCB  | 337.9207          | M+2      | <sup>13</sup> C Cl-5 PCB |
| 327.8775          | M+4      | Cl-5 PCB  | 339.9178          | M+4      | <sup>13</sup> C Cl-5 PCB |
| 359.8415          | M+2      | Cl-6 PCB  | 371.8817          | M+2      | <sup>13</sup> C Cl-6 PCB |
| 361.8385          | M+4      | Cl-6 PCB  | 373.8788          | M+4      | <sup>13</sup> C Cl-6 PCB |
| 393.8025          | M+2      | Cl-7 PCB  | 405.8428          | M+2      | <sup>13</sup> C Cl-7 PCB |
| 395.7995          | M+4      | Cl-7 PCB  | 407.8498          | M+4      | <sup>13</sup> C Cl-7 PCB |
| 427.7635          | M+2      | Cl-8 PCB  | 439.8038          | M+2      | <sup>13</sup> C Cl-8 PCB |
| 429.7606          | M+4      | Cl-8 PCB  | 441.8008          | M+4      | <sup>13</sup> C Cl-8 PCB |
| 461.7246          | M+2      | Cl-9 PCB  |                   |          |                          |
| 463.7216          | M+4      | Cl-9 PCB  |                   |          |                          |
| 495.6856          | M+2      | Cl-10 PCB |                   |          |                          |
| 497.6826          | M+4      | Cl-10 PCB |                   |          |                          |

**Table S4** Masses and m/z types of monitored PCNs

| Mass/Charge ratio | m/z type | PCN      | Mass/Charge ratio | m/z type | PCN                      |
|-------------------|----------|----------|-------------------|----------|--------------------------|
| 162.0236          | M        | Cl-1 PCN |                   |          |                          |
| 164.0208          | M+2      | Cl-1 PCN |                   |          |                          |
| 195.9847          | M        | Cl-2 PCN |                   |          |                          |
| 197.9818          | M+2      | Cl-2 PCN |                   |          |                          |
| 229.9457          | M        | Cl-3 PCN |                   |          |                          |
| 231.9428          | M+2      | Cl-3 PCN |                   |          |                          |
| 263.9067          | M        | Cl-4 PCN | 275.9469          | M        | <sup>13</sup> C Cl-4 PCN |
| 265.9038          | M+2      | Cl-4 PCN | 277.9440          | M+2      | <sup>13</sup> C Cl-4 PCN |
| 299.8648          | M        | Cl-5 PCN | 311.9050          | M        | <sup>13</sup> C Cl-5 PCN |
| 301.8619          | M+2      | Cl-5 PCN | 313.9021          | M+2      | <sup>13</sup> C Cl-5 PCN |
| 333.8258          | M        | Cl-6 PCN | 345.8661          | M        | <sup>13</sup> C Cl-6 PCN |
| 335.8229          | M+2      | Cl-6 PCN | 347.8632          | M+2      | <sup>13</sup> C Cl-6 PCN |
| 367.7869          | M        | Cl-7 PCN | 379.8271          | M        | <sup>13</sup> C Cl-7 PCN |
| 369.7839          | M+2      | Cl-7 PCN | 381.8242          | M+2      | <sup>13</sup> C Cl-7 PCN |
| 401.7479          | M        | Cl-8 PCN | 413.7881          | M        | <sup>13</sup> C Cl-8 PCN |
| 403.7450          | M+2      | Cl-8 PCN | 415.7852          | M+2      | <sup>13</sup> C Cl-8 PCN |

**Table S5** Masses and m/z types of monitored CIPAHs

| Mass/Charge ratio | m/z type | CIPAH                                     |
|-------------------|----------|-------------------------------------------|
| 200.0393          | M        | CIFLU                                     |
| 212.0393          | M        | CIPHE + CIANT                             |
| 246.0003          | M        | Cl <sub>2</sub> PHE + Cl <sub>2</sub> ANT |
| 236.0393          | M        | CIFLA + CIPYR                             |
| 270.0003          | M        | Cl <sub>2</sub> FLA + Cl <sub>2</sub> PYR |
| 262.0549          | M        | ClBaA + ClCHR                             |
| 296.0160          | M        | Cl <sub>2</sub> BaA + Cl <sub>2</sub> CHR |
| 286.0549          | M        | CIBAP                                     |
| 188.1410          | M        | d <sub>10</sub> -PHE                      |
| 212.1410          | M        | d <sub>10</sub> -PYR                      |

**Table S6** HRGC/HRMS instrumental analysis conditions for PCDD/Fs, PCBs, PCNs and CIPAHs

| Parameters             | PCDD/F                                                                                                                                                                        | PCB                                                                                                                                     | PCN                                                                                                                                    | CIPAH                                                     |
|------------------------|-------------------------------------------------------------------------------------------------------------------------------------------------------------------------------|-----------------------------------------------------------------------------------------------------------------------------------------|----------------------------------------------------------------------------------------------------------------------------------------|-----------------------------------------------------------|
| Injector Temperature   | 280 °C                                                                                                                                                                        | 280 °C                                                                                                                                  | 280 °C                                                                                                                                 | 280 °C                                                    |
| GC Column              | HP-5 ms (60 m × 250 μm mm ID × 0.25μm df)                                                                                                                                     | HP-5 ms (60 m × 250 μm mm ID × 0.25μm df)                                                                                               | HP-5 ms (60 m × 250 μm mm ID × 0.25μm df)                                                                                              | HP-5 ms (60 m × 250 μm mm ID × 0.25μm df)                 |
| Temperature Program    | 120 °C (1 min), 43 °C min <sup>-1</sup> to 220 °C (15min), 2.3 °C min <sup>-1</sup> to 250 °C, 0.9 °C min <sup>-1</sup> to 260 °C, 20 °C min <sup>-1</sup> to 310 °C (20 min) | 90 °C (2 min), 20 °C min <sup>-1</sup> to 180 °C (15 min), 3 °C min <sup>-1</sup> to 300 °C, 30 °C min <sup>-1</sup> to 320 °C (10 min) | 90 °C (2 min), 20 °C min <sup>-1</sup> to 200 °C, 3 °C min <sup>-1</sup> to 280 °C (5 min), 20 °C min <sup>-1</sup> to 320 °C (15 min) | 100 °C (2 min), 5 °C min <sup>-1</sup> to 300 °C (20 min) |
| Injection mode         | Splitless                                                                                                                                                                     | Splitless                                                                                                                               | Splitless                                                                                                                              | Splitless                                                 |
| Carrier gas            | He                                                                                                                                                                            | He                                                                                                                                      | He                                                                                                                                     | He                                                        |
| Ion source Temperature | 250 °C                                                                                                                                                                        | 250 °C                                                                                                                                  | 250 °C                                                                                                                                 | 250 °C                                                    |
| Detection Ions         | SIM                                                                                                                                                                           | SIM                                                                                                                                     | SIM                                                                                                                                    | SIM                                                       |
| Ionization mode        | EI                                                                                                                                                                            | EI                                                                                                                                      | EI                                                                                                                                     | EI                                                        |
| Ionization Energy      | 37 eV                                                                                                                                                                         | 37 eV                                                                                                                                   | 37 eV                                                                                                                                  | 37 eV                                                     |
| Resolution             | ≥ 10 000                                                                                                                                                                      | ≥ 10 000                                                                                                                                | ≥ 10 000                                                                                                                               | ≥ 10 000                                                  |

**Table S7** Detailed results of method validation for the analysis of target CAHs congeners

|                   | Linear range ( pg) | MDL (pg g <sup>-1</sup> ) | Spiking level (pg g <sup>-1</sup> ) | Recovery (n = 7) % | Precision (n = 7) % |
|-------------------|--------------------|---------------------------|-------------------------------------|--------------------|---------------------|
| PCDD/F            |                    |                           |                                     |                    |                     |
| 2,3,7,8-TCDF      | 0.5–200            | 6.8                       | 100                                 | 81.5               | 2.8                 |
| 2,3,4,7,8-PeCDF   | 2.5–1000           | 7.4                       | 100                                 | 105.2              | 4.4                 |
| 1,2,3,7,8-PeCDF   | 2.5–1000           | 6.3                       | 100                                 | 97.4               | 6.1                 |
| 1,2,3,4,7,8-HxCDF | 2.5–1000           | 13.4                      | 100                                 | 81.3               | 4.4                 |
| 1,2,3,6,7,8-HxCDF | 2.5–1000           | 2.9                       | 100                                 | 84.6               | 3.6                 |
| 2,3,4,6,7,8-HxCDF | 2.5–1000           | 3.7                       | 100                                 | 78.4               | 9.4                 |
| 1,2,3,7,8,9-HxCDF | 2.5–1000           | 0.1                       | 100                                 | 80.9               | 4.4                 |
| 1,2,3,4,6,7,8-    | 2.5–1000           | 1.7                       | 100                                 | 94.3               | 10.2                |
| HpCDF             |                    |                           |                                     |                    |                     |
| 1,2,3,4,7,8,9-    | 2.5–1000           | 1.0                       | 100                                 | 92.8               | 8.2                 |
| HpCDF             |                    |                           |                                     |                    |                     |
| OCDF              | 5.0–2000           | 1.6                       | 200                                 | 83.3               | 13.0                |
| TCDD              |                    |                           |                                     |                    |                     |
| 2,3,7,8-TCDD      | 0.5–200            | 0.2                       | 100                                 | 96.1               | 8.4                 |
| 1,2,3,7,8-PeCDD   | 2.5–1000           | 0.5                       | 100                                 | 116.0              | 1.6                 |
| 1,2,3,6,7,8-HxCDD | 2.5–1000           | 0.4                       | 100                                 | 97.0               | 7.6                 |
| 1,2,3,4,7,8-HxCDD | 2.5–1000           | 0.2                       | 100                                 | 90.2               | 6.2                 |
| 1,2,3,7,8,9-HxCDD | 2.5–1000           | 0.4                       | 100                                 | 97.0               | 7.6                 |
| 1,2,3,4,6,7,8-    | 2.5–1000           | 0.8                       | 100                                 | 107.7              | 3.4                 |
| HpCDD             |                    |                           |                                     |                    |                     |
| OCDD              | 5.0–2000           | 1.6                       | 200                                 | 83.3               | 13.0                |
| PCB               |                    |                           |                                     |                    |                     |
| PCB-77            | 0.1–200            | 0.5                       | 100                                 | 95.6               | 4.6                 |
| PCB-81            | 0.1–200            | 0.2                       | 100                                 | 89.0               | 5.5                 |
| PCB-105           | 0.1–200            | 0.6                       | 100                                 | 73.2               | 7.7                 |
| PCB-114           | 0.1–200            | 0.1                       | 100                                 | 96.3               | 6.3                 |
| PCB-118           | 0.6–1200           | 0.9                       | 100                                 | 83.5               | 5.4                 |
| PCB-123           | 0.1–200            | 0.6                       | 100                                 | 94.2               | 6.7                 |
| PCB-126           | 0.1–200            | 0.04                      | 100                                 | 89.8               | 6.4                 |
| PCB-156           | 0.1–200            | 0.2                       | 100                                 | 82.9               | 7.9                 |
| PCB-157           | 0.1–200            | 0.07                      | 100                                 | 88.0               | 3.9                 |
| PCB-167           | 0.1–200            | 0.5                       | 100                                 | 105.2              | 5.8                 |
| PCB-169           | 0.1–200            | 0.05                      | 100                                 | 93.5               | 5.4                 |
| PCB-189           | 0.1–200            | 0.2                       | 100                                 | 95.8               | 6.6                 |
| PCB-28            | 0.1–5000           | 11.1                      | 100                                 | 87.9               | 5.7                 |
| PCB-52            | 0.1–5000           | 5.9                       | 100                                 | 106.1              | 5.3                 |
| PCB-101           | 0.1–5000           | 2.4                       | 100                                 | 99.7               | 7.1                 |
| PCB-138           | 0.1–5000           | 1.4                       | 100                                 | 95.5               | 4.9                 |



|                          |          |      |     |       |      |
|--------------------------|----------|------|-----|-------|------|
| PCB-153                  | 0.1–5000 | 3.1  | 100 | 90.8  | 6.0  |
| PCB-180                  | 0.1–5000 | 2.5  | 100 | 76.6  | 4.4  |
| PCN                      |          |      |     |       |      |
| PCN-27                   | 2–100    | 1.2  | 100 | 96.6  | 4.1  |
| PCN-36                   | 2–100    | 0.7  | 100 | 101.3 | 2.9  |
| PCN-46                   | 2–100    | 0.3  | 100 | 115.8 | 6.7  |
| PCN-48                   | 2–100    | 0.6  | 100 | 109.4 | 5.2  |
| PCN-50                   | 2–100    | 0.7  | 100 | 100.6 | 5.5  |
| PCN-53                   | 2–100    | 0.7  | 100 | 121.2 | 4.1  |
| PCN-69                   | 2–100    | 0.3  | 100 | 125.8 | 3.4  |
| PCN-72                   | 2–100    | 0.2  | 100 | 126.4 | 6.0  |
| PCN-2                    | 2–100    | 19.4 | 100 | 25.7  | 14.9 |
| PCN-6                    | 2–100    | 48.5 | 100 | 31.6  | 9.1  |
| PCN-13                   | 2–100    | 7.0  | 100 | 70.8  | 7.5  |
| PCN-28                   | 2–100    | 2.3  | 100 | 124.5 | 4.1  |
| PCN-52                   | 2–100    | 0.5  | 100 | 102.9 | 6.1  |
| PCN-66                   | 2–100    | 1.5  | 100 | 122.3 | 4.8  |
| PCN-73                   | 2–100    | 1.1  | 100 | 135.6 | 0.9  |
| PCN-75                   | 2–100    | 9.7  | 100 | 132.8 | 3.1  |
| CIPAHA                   |          |      |     |       |      |
| 9-CIFLU                  | 1–500    | 9.5  | 100 | 69.8  | 6.9  |
| 9-CIPHE                  | 0.1–500  | 3.5  | 100 | 90.1  | 1.7  |
| 2-CIANT                  | 0.1–500  | 5.4  | 100 | 61.7  | 7.6  |
| 9-CIANT                  | 0.1–500  | 4.1  | 100 | 108.5 | 9.5  |
| 3-CIFLA                  | 0.1–500  | 5.2  | 100 | 106.1 | 4.7  |
| 1-CIPYR                  | 0.1–500  | 3.7  | 100 | 70.8  | 2.4  |
| 9,10-Cl <sub>2</sub> ANT | 1–500    | 3.5  | 100 | 63.4  | 4.3  |
| 1,3-Cl <sub>2</sub> FIA  | 1–500    | 4.1  | 100 | 105.2 | 2.4  |
| 6-ClBaP                  | 1–500    | 4.7  | 100 | 69.2  | 9.7  |

**Table S8** Concentrations and WHO-TEQs of CAHs in fly ash from the industrial thermal processes

| Compounds (ng kg <sup>-1</sup> )                            | Fly ash 1 | Fly ash 2 | Fly ash 3 | Fly ash 4 |
|-------------------------------------------------------------|-----------|-----------|-----------|-----------|
| PCDD/Fs                                                     |           |           |           |           |
| 2,3,7,8-TCDD                                                | 8.2       | 20.7      | 24.0      | 682.0     |
| 1,2,3,7,8-PeCDD                                             | 12.5      | 77.3      | 9.8       | 262.7     |
| 1,2,3,4,7,8-HxCDD                                           | 16.5      | 69.3      | 11.9      | 527.5     |
| 1,2,3,6,7,8-HxCDD                                           | 9.0       | 89.7      | 23.1      | 665.3     |
| 1,2,3,7,8,9-HxCDD/(1,2,3,4,6,7- HxCDD)                      | 12.0      | 118.8     | 15.9      | 1331      |
| 1,2,3,4,6,7,8-HpCDD                                         | 46.4      | 522.2     | 316.1     | 8715      |
| OCDD                                                        | 30.5      | 732.6     | 832.9     | 10644     |
| 2,3,7,8-TCDF                                                | 400.6     | 2058      | 214.5     | 2992      |
| 1,2,3,7,8-PeCDF                                             | 79.4      | 458.2     | 32.3      | 372.4     |
| 2,3,4,7,8-PeCDF/(1,2,4,8,9-,1,2,6,7,9-,<br>1,2,3,6,9-PeCDF) | 125.3     | 1089      | 69.8      | 1608      |
| 1,2,3,4,7,8-HxCDF/(1,2,3,4,6,7- HxCDF)                      | 175.5     | 1928      | 82.3      | 2243      |
| 1,2,3,6,7,8-HxCDF                                           | 68.9      | 655.3     | 39.4      | 792.0     |
| 1,2,3,7,8,9-HxCDF                                           | 6.7       | 61.9      | 3.1       | 97.4      |
| 2,3,4,6,7,8-HxCDF                                           | 50.4      | 640.2     | 28.0      | 1360      |
| 1,2,3,4,6,7,8-HpCDF                                         | 141.9     | 1855      | 92.4      | 3043      |
| 1,2,3,4,7,8,9-HpCDF                                         | 19.8      | 250.8     | 13.4      | 511.7     |
| OCDF                                                        | 52.3      | 606.2     | 43.1      | 1117      |
| WHO <sub>2005</sub> -TEQ                                    | 153.6     | 1196      | 110.8     | 2754      |
| PCDDs                                                       | 559.0     | 3686      | 5060      | 102610    |
| PCDFs                                                       | 4431      | 26384     | 2424      | 38390     |
| PCDF/PCDD                                                   | 7.9       | 7.2       | 0.5       | 0.4       |
| Total PCDD/Fs                                               | 4990      | 30070     | 7484      | 141000    |
| DI-PCBs                                                     |           |           |           |           |
| PCB-77                                                      | 475.0     | 224.1     | 50.5      | 134.3     |
| PCB-81                                                      | 46.7      | 38.9      | 22.4      | 35.2      |
| PCB-105                                                     | 746.4     | 324.7     | 72.0      | 125.2     |
| PCB-114                                                     | 16.9      | 6.5       | 7.6       | 6.9       |
| PCB-118                                                     | 713.1     | 148.1     | 49.5      | 54.4      |
| PCB-123                                                     | 107.6     | 92.6      | 23.3      | 58.4      |
| PCB-126                                                     | 32.4      | 230.8     | 31.0      | 179.4     |
| PCB-156                                                     | 232.8     | 213.8     | 26.8      | 73.3      |
| PCB-157                                                     | 24.9      | 91.3      | 21.3      | 56.9      |
| PCB-167/ PCB-128                                            | 245.2     | 83.0      | 20.6      | 49.5      |
| PCB-169                                                     | 7.3       | 82.3      | 15.9      | 57.6      |
| PCB-189                                                     | 68.9      | 140.2     | 25.4      | 64.6      |

|                          |       |        |        |        |
|--------------------------|-------|--------|--------|--------|
| WHO <sub>2005</sub> -TEQ | 3.6   | 25.6   | 3.6    | 19.7   |
| Indicator PCBs           |       |        |        |        |
| PCB-28                   | 7610  | 463.3  | 1452   | 466.7  |
| PCB-52                   | 1329  | 149.7  | 342.9  | 188.5  |
| PCB-101                  | 722.1 | 96.9   | 83.8   | 67.8   |
| PCB-138                  | 2809  | 225.0  | 48.9   | 74.2   |
| PCB-153                  | 2215  | 87.0   | 25.6   | 38.9   |
| PCB-180                  | 2252  | 104.0  | 16.9   | 29.1   |
| Total PCBs               | 58428 | 8027   | 9669   | 6252   |
| PCNs                     |       |        |        |        |
| PCN-2                    | 99.3  | 35.0   | 533.0  | 129.7  |
| PCN-1                    | 79.2  | 55.4   | 1210   | 189.2  |
| PCN-4                    | 51.2  | 58.1   | 248.9  | 205.4  |
| PCN-5/7                  | 105.5 | 132.0  | 484.9  | 29.2   |
| PCN-10                   | 171.7 | 79.4   | 552.8  | 1004   |
| PCN-48                   | 18.0  | 24.7   | 76.3   | 116.3  |
| PCN-38/40                | 30.9  | 48.9   | 77.5   | 86.8   |
| PCN-50                   | 31.3  | 126.2  | 71.9   | 132.1  |
| PCN-35                   | 30.4  | 48.0   | 108.5  | 114.6  |
| PCN-54                   | 19.4  | 1.5    | 29.0   | 9.9    |
| PCN-57                   | 42.0  | 43.67  | 136.24 | 135.60 |
| PCN-56                   | 6.7   | 25.48  | 23.50  | 53.28  |
| PCN-66/67                | 227.6 | 678.41 | 177.13 | 242.68 |
| PCN-64/68                | 3.1   | 3.4    | 1.7    | 2.7    |
| PCN-69                   | 12.5  | 69.8   | 31.4   | 52.6   |
| PCN-72                   | 7.3   | 13.4   | 11.4   | 14.5   |
| PCN-63                   | 13.9  | 117.2  | 26.3   | 99.2   |
| PCN-70                   | 3.2   | 2.6    | 3.2    | 3.9    |
| PCN-TEQ                  | 172.8 | 297.6  | 34.2   | 100.1  |
| Total PCN                | 3707  | 5303   | 10398  | 10935  |
| CIPAHs                   |       |        |        |        |
| 9-CIFLU                  | 75.2  | 266.2  | 49.9   | nd     |
| 9-CIPHE                  | 1638  | 1898   | 900.9  | 434.2  |
| 2-CIANT                  | 644.1 | 718.1  | 461.8  | 110.9  |
| 9-CIANT                  | 24.7  | 14.4   | 6.3    | 1.7    |
| 3-CIFLA                  | 1040  | 1299   | 1041   | 318.9  |
| 1-CIPYR                  | 2071  | 137.1  | 1023   | 64.8   |
| 9,10-Cl <sub>2</sub> ANT | 44.0  | 108.1  | 33.4   | nd     |
| 1,3-Cl <sub>2</sub> FIA  | 75.4  | 84.2   | 29.7   | 7.0    |
| 6-CIBaP                  | 125.9 | 400.6  | 38694  | 9.0    |
| Total CIPAHs             | 24450 | 25255  | 218524 | 2524   |

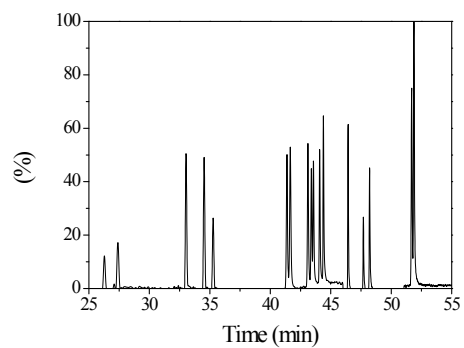

(a)

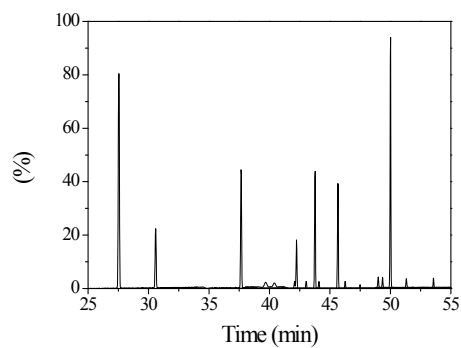

(b)

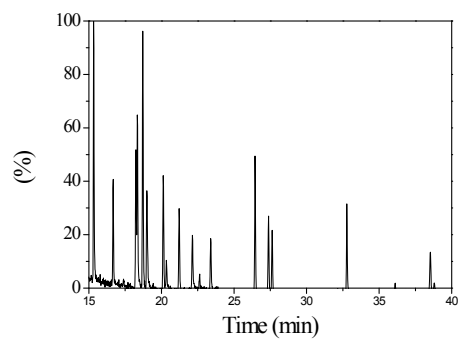

(c)

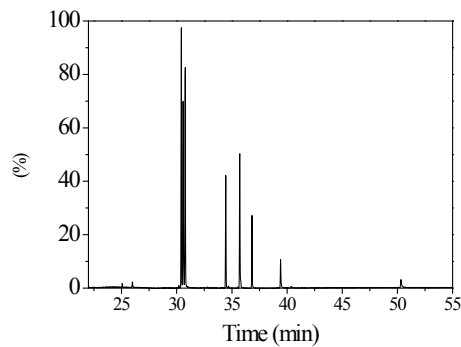

(d)

**Fig. S1** Total ion current (TIC) chromatogram for a standard solution containing PCDD/Fs (a), PCBs (b), PCNs (c), and CIPAHs (d)
